# Supplementary material for: Correlation of ankle dorsiflexion range of motion with lower-limb kinetic chain function and hop test performance in healthy male recreational athletes
Source: PeerJ. 2023 Feb 21;11:e14877. doi: 10.7717/peerj.14877 (PMC9951801; doi:10.7717/peerj.14877)
Supplement: Supplemental Information 1 [file peerj-11-14877-s001.xlsx]

## Sheet: Sheet1
Practice yr	min/day	days/wk	Age	Height	Weight	BMI	DCG	NDCG	DPF	NDPF	DDFKF	DDFKE	NDDFKF	NDDFKE	DGE	NDGE	DSE	NDSE	CKCLEST	DSHDT	NDSHDT	DSHT	NDSHT
12	90	7	23	172	55	18.96	32	33	66	60	26	6	14	6	14	16	18	24	18	123	132	43	41
3	180	6	18	173	56	19.37	36	34	72	74	16	6	10	8	20	12	20	18	24	164	163	51	55
2	180	6	18	178	58	18.7	32	32	58	60	16	12	12	4	30	24	34	30	28	172.5	181	26	29
8	120	2	19	179	66	20.62	34	33	70	70	12	12	14	6	30	24	26	32	17	181	171.5	52	51
8	120	7	18	173	67	22.41	37	37	64	82	20	4	10	4	14	18	26	28	24	142	150	34	35
12	60	3	20	179	60	18.75	32.5	32.5	50	56	20	2	22	6	28	30	34	28	22	153.5	146.5	24	26
4	30	4	23	176	77	24.84	38.5	37	64	68	26	2	22	4	32	42	34	44	25	135	128	50	52
15	120	6	24	160	57	22.27	34	35	52	70	20	2	20	10	26	24	30	20	21	132	136	41	42
1	120	5	18	187	81	23.21	39	39	64	60	16	10	20	16	26	26	30	32	22	153	148	38	44
16	180	3	24	173	73	24.41	36	35	72	64	24	20	32	24	26	28	34	38	31	157	150.5	64	62
10	120	2	18	170	63	21.8	37	37	74	60	34	10	10	2	36	30	40	32	22	121	124	32	26
5	240	6	25	167	60	19.35	34.5	35	86	80	34	12	32	14	32	28	40	34	22	105	107	34	32
2	90	4	23	180	74	22.84	36.5	36.5	64	78	40	20	50	30	50	50	54	60	22	139	130	40	39
8	120	7	19	179	67	20.94	37.5	37.5	66	74	10	8	22	4	24	26	26	32	20	125	130	35	41
12	180	7	19	173	68	22.74	36	36	76	70	26	14	24	10	28	30	32	34	20	122	130	51	50
2	240	6	20	167	62	22.22	36.5	37	70	64	22	6	22	12	36	28	38	36	36	198	193.5	69	63
12	240	5	27	178	64	20.19	36	36	76	80	40	24	30	16	30	34	44	40	29	179	178	65	62
15	120	6	21	176	67	23.76	38.5	38.5	70	68	40	12	40	20	36	38	40	44	35	116	114	53	54
13	120	5	25	169	59.5	20.8	34.5	35	60	64	20	8	32	12	34	28	46	32	40	176	194	72	79
17	180	5	25	160	61	23.83	36.5	36.5	68	66	46	30	50	26	38	42	46	48	29	155	162	53	50
10	40	5	25	170	57	19.72	34.5	33.5	50	68	30	10	40	16	38	38	42	42	21	131	132	34	34
						BMI (body mass index)
						DCG (dominant lower-limb calf maximal girth/circumference)
						NDCG (non-dominant lower-limb calf maximal girth/circumference)
						DPF (dominant lower-limb ankle plantarflexion range of motion)
						NDPF (non-dominant lower-limb ankle plantarflexion range of motion)
						DDFKF (dominant lower-limb open-chain ankle dorsiflexion range of motion with knee flexion)
						DDFKE (dominant lower-limb open-chain ankle dorsiflexion range of motion with knee extension)
						NDDFKF (non-dominant lower-limb open-chain ankle dorsiflexion range of motion with knee flexion)
						NDDFKE (non-dominant lower-limb ankle open-chain dorsiflexion range of motion with knee extension)
						DGE (dominant lower-limb Gastrocnemius extensibility (weight-bearing ankle dorsiflexion range of motion with knee extension))
						NDGE (non-dominant lower-limb Gastrocnemius extensibility (weight-bearing ankle dorsiflexion range of motion with knee extension)
						DSE (dominant lower-limb Soleus extensibility (weight-bearing ankle dorsiflexion range of motion with knee flexion)
						NDSE (non-dominant lower-limb Soleus extensibility (weight-bearing ankle dorsiflexion range of motion with knee flexion)
						CKCLEST (closed kinetic chain lower extremity stability test reading (repetition/15 seconds))
						DSHDT (single leg hop for distance test (in centimeters) for the dominant lower limb)
						NDSHDT (single leg hop for distance test (in centimeters) for the non-dominant lower limb)
						DSHT (single leg side hop test reading (repetition/30 seconds) for the dominant lower limb)
						NDSHT (single leg side hop test reading (repetition/30 seconds) for the non-dominant lower limb)
